# Supplementary material
Source: PubMed Central journal article supplement (PMC8406858)
Supplement: glab206_suppl_Supplementary_Figures.pdf [file glab206_suppl_Supplementary_Figures.pdf]

## **Supplementary Materials**

Figure S1. Distribution of negative, positive and not-available samples for all cellular studies.

Figure S2. Relationship between memory T and B lymphocytes against SARS-CoV-2.

Figure S3. Relationship between anti-S and anti-N-specific IgG antibody titer and the cellular memory to SARS-CoV-2.

Figure S4. Frequency of (A) T and (B) B lymphocytes in the ELISpot assays, by severity of disease.

Figure S5. Relationship between cellular and humoral memory to SARS-CoV-2 and age (A-D), time since diagnosis of the infection (E-H), number of SARS-CoV-2 RNA copies (I-L) and gender (M-P).

Supplementary figures:

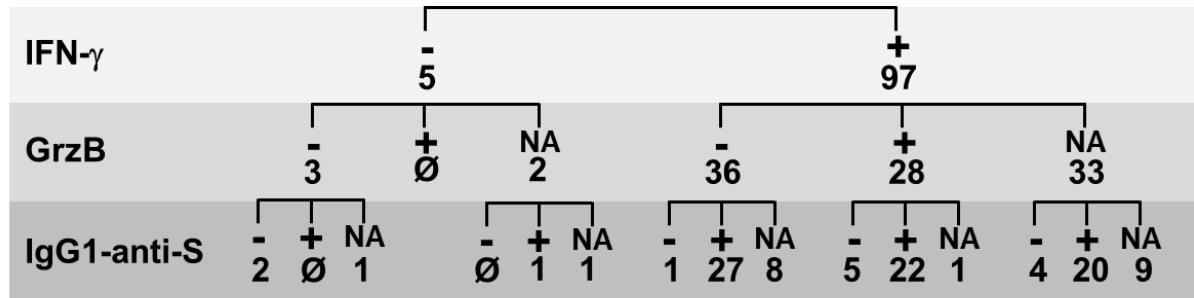

NA: not-available sample

**Figure S1. Distribution of negative, positive and not-available samples for all cellular performed studies: IFN-γ and granzyme B producer T lymphocytes and IgG1 anti-S producer B lymphocytes.**

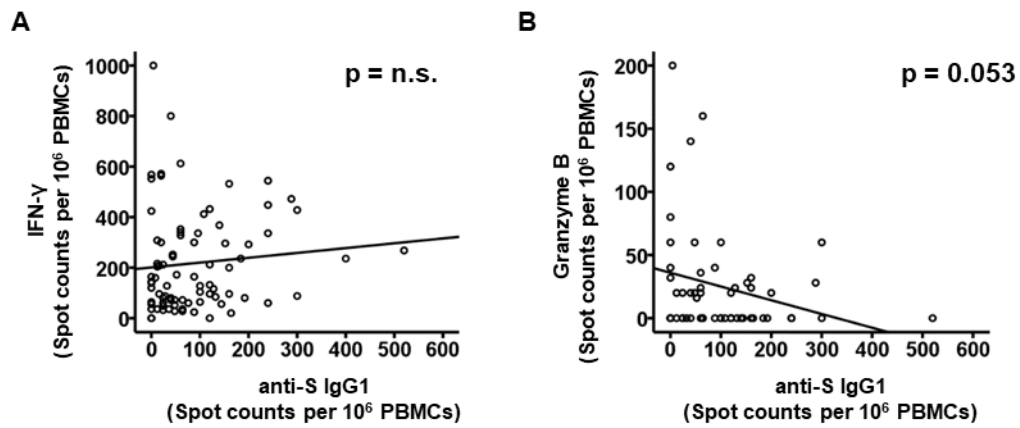

**Figure S2. Relationship between memory T and B lymphocytes against SARS-CoV-**

**2.** Relationship between memory B lymphocyte response and (A) IFN- $\gamma$  and (B) granzyme B production were analysed. p values and coefficients of correlation were calculated by using the Pearson test, n.s.: not significant.

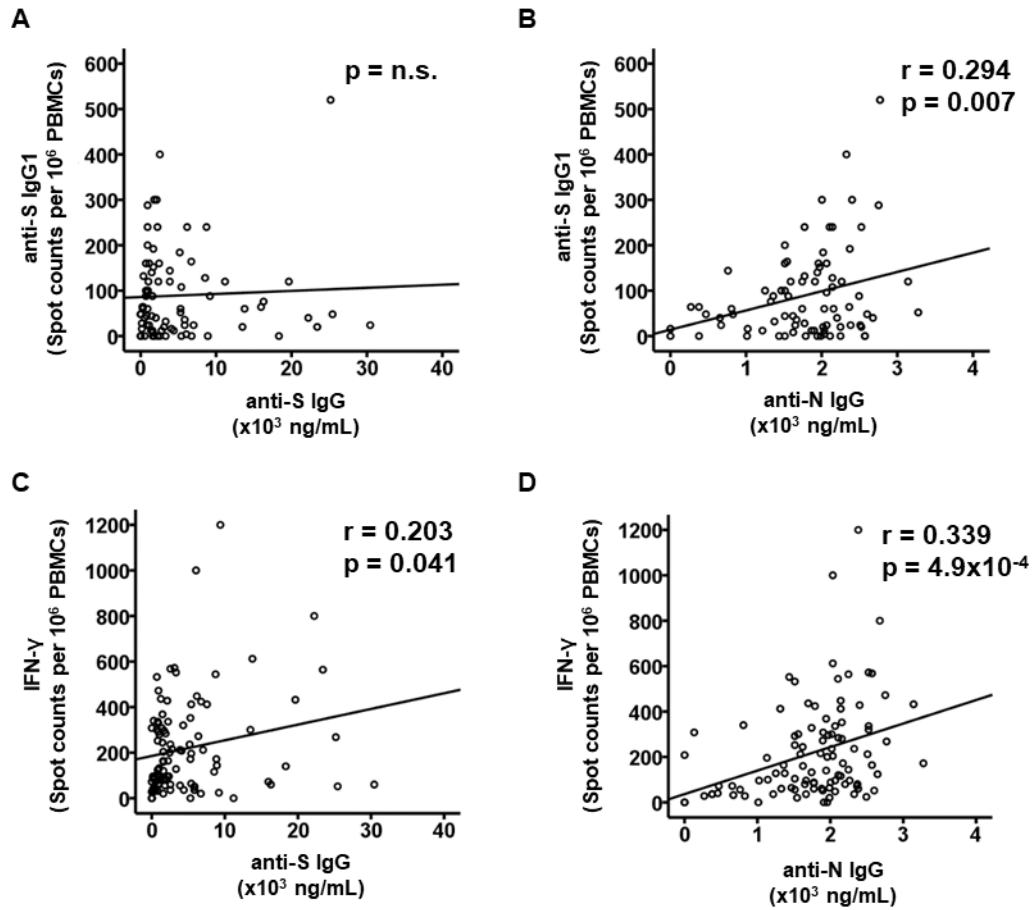

**Figure S3. Relationship between anti-S and anti-N-specific IgG antibody titer and the cellular memory to SARS-CoV-2.** The correlations between memory B lymphocyte response and (A) anti-S and (B) anti-N IgG plasma titers were analysed. The correlations between IFN- $\gamma$  production and (C) anti-S and (D) anti-N IgG plasma titers were analysed. Pearson correlation coefficients and probabilities are shown in the upper right-hand corner; n.s.: not significant.

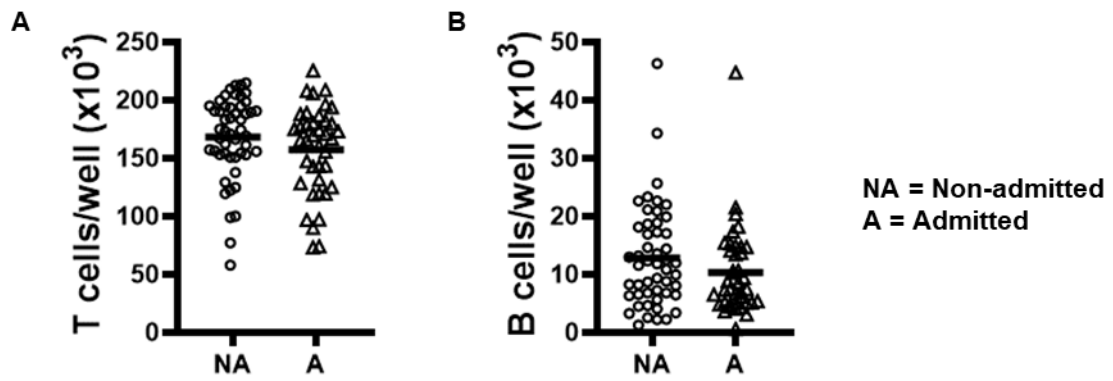

**Figure S4. Number of (A) T and (B) B lymphocytes in the ELISPOT assays according to the severity of the disease.** Number of T and B lymphocytes was analysed by flow-cytometry. Data are shown as scatter plots, horizontal lines mark mean values with means.

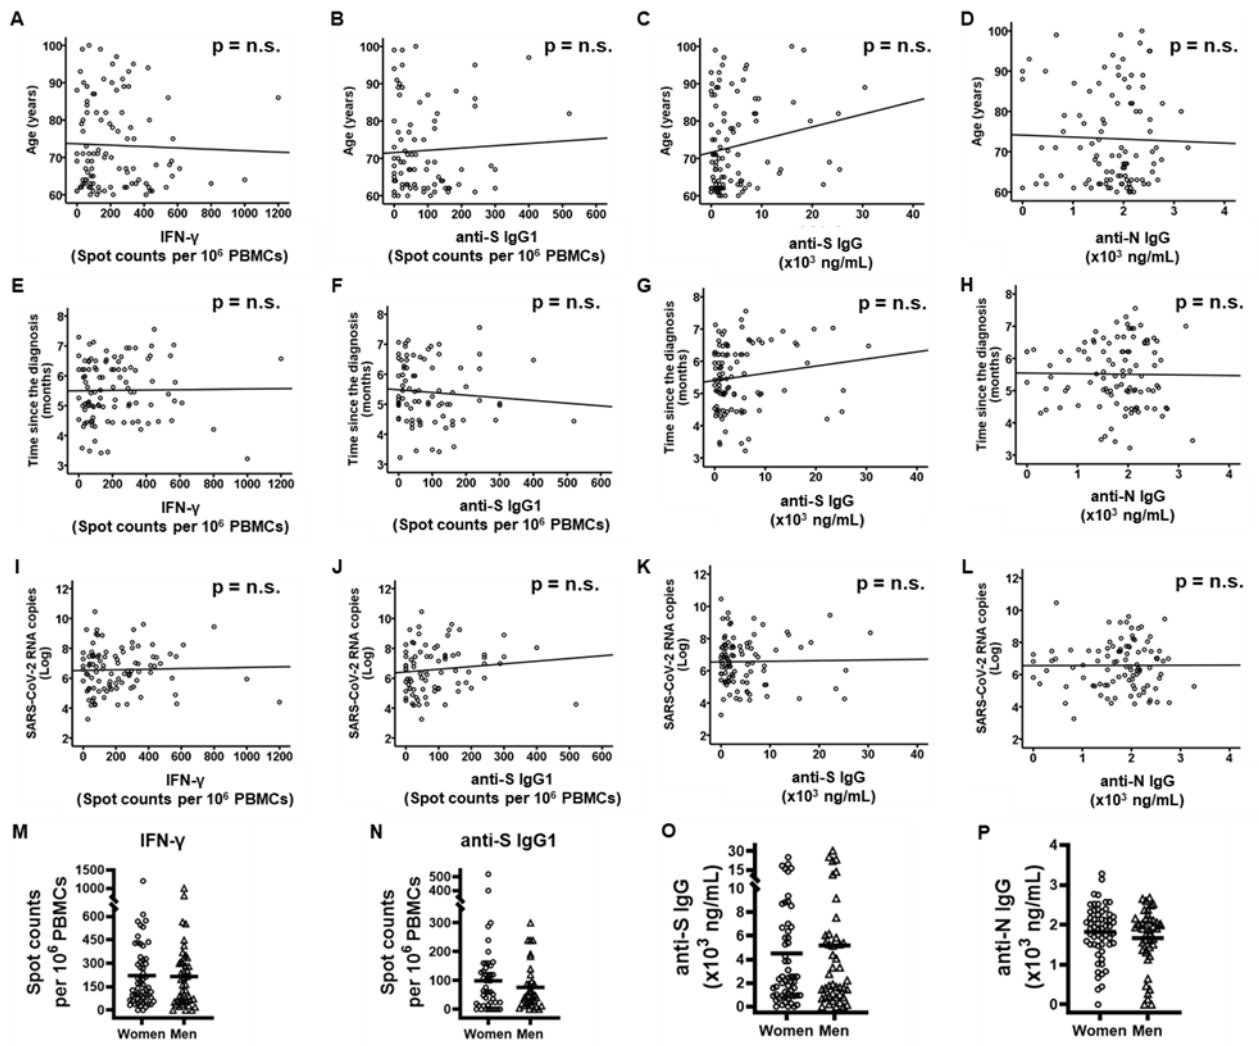

**Figure S5. Relationship between cellular and humoral memory against SARS-CoV-2 and age (A-D), time since the diagnosis of the infection (E-H), number of copies of SARS-CoV-2 RNA copies (I-L) and sex (M-P).** The correlations between age and (A) IFN- $\gamma$  production, (B) memory B lymphocyte response, (C) anti-S and (D) anti-N IgG plasma titers were analyzed. The correlations between the time since the diagnosis of the infection and (E) IFN- $\gamma$  production, (F) memory B lymphocyte response, (G) anti-S and (H) anti-N IgG plasma titers were analyzed. The correlations between the number of copies of SARS-CoV-2 RNA copies and (I) IFN- $\gamma$  production, (J) memory B lymphocyte response, (K) anti-S and (L) anti-N IgG plasma titers were analyzed. p values and coefficients of correlation were calculated by using the Pearson test, n.s.: not significant.

Scatter plots show the number of antigen-specific spot forming cells producing **(M)** IFN- $\gamma$  or **(N)** anti-S IgG1 in women and men. Serum titers of **(O)** anti-S or **(P)** anti-N IgG. Data are shown as scatter plots, horizontal lines mark mean values.
